# Supplementary material for: Unique Pt5 metallacycle: [PtIICl(pyrrolidinedithiocarbamate)]5
Source: Royal Society of Chemistry journal article supplement (doi:10.1039/c1dt11475a), 2011-01-01
Supplement: c1dt11475a.pdf [file c1dt11475a.pdf]

# Unique Pt<sub>5</sub> metallacycle: [Pt<sup>II</sup>Cl(pyrrolidinedithiocarbamate)]<sub>5</sub> †

Diego Montagner and Pablo J. Sanz Miguel

## Electronic Supplementary Information

### Instrumental and Synthesis:

Elemental analyses were carried out on a Fisons EA1108 CHNS-O microanalyser. IR spectra were recorded on Nicolet 5SXC FT-IR and 20F Far-IR spectrometers, as either Nujol mulls between KBr and polyethylene discs or as KBr pellets. Thermogravimetric data in air were obtained on Netzsch STA 449 thermoanalytical equipment (flux rate, 50 cm<sup>3</sup> min<sup>-1</sup>; heating rate, 5 °C min<sup>-1</sup>; and ref. material Al<sub>2</sub>O<sub>3</sub>). The weight of the samples in the crucible was about 15-25 mg.

PtCl<sub>2</sub>, PPh<sub>3</sub> and all the solvents were of commercial origin. PyDTM was synthesized as previously reported.<sup>S1</sup>

[PtCl<sub>2</sub>(PyDTM)] (**1**) was prepared by adding PtCl<sub>2</sub> (1.46 mmol) to a PyDTM solution in dichloromethane (1.60 mmol in 7 mL) with vigorous stirring (18 h). A red solution of the 1:2 adduct formed initially, which reacted slowly with residual PtCl<sub>2</sub> yielding a yellow solid, which was filtered, washed with CH<sub>2</sub>Cl<sub>2</sub> and *n*-pentane and dried under reduced pressure. Yield, 85%. Anal. Calc. (%) for C<sub>6</sub>H<sub>11</sub>Cl<sub>2</sub>NPtS<sub>2</sub> (427.07): C, 16.87; H, 2.60; N, 3.28; S, 14.99. Found: C, 16.70; H, 2.52; N, 3.39; S, 14.72. IR data: 1583 (v, N-CSS); 325, 313 (v, Pt-Cl) cm<sup>-1</sup>.

[PtCl(PyDT)]<sub>5</sub> (**2**) has been prepared by thermal degradation of **1** (following the thermogravimetric profile). A solid sample of **1** (400 mg) was heated gradually in oil bath up to 200 °C under reduced pressure, and maintained at this temperature for 5 hours. The complexes are slightly soluble in dichloroethane, from which they precipitate as orange aggregates by addition of *n*-pentane. Yield, 92%. Anal. Calc. (%) for 5×(C<sub>5</sub>H<sub>8</sub>ClNPtS<sub>2</sub>) 5×(376.58): C, 15.95; H, 2.15; N, 3.72; S, 16.99. Found: C, 15.78; H, 2.05; N, 3.90; S, 17.20. IR data: 1551 (v, N-CSS); 317 (v, Pt-Cl) cm<sup>-1</sup>.

[PtCl(PyDT)(PPh<sub>3</sub>)]·0.5CH<sub>2</sub>Cl<sub>2</sub> (**3**): 0.31 mmol of PPh<sub>3</sub> and 0.31 mmol of **2** were suspended in 5 mL of CH<sub>2</sub>Cl<sub>2</sub>. After 30 min a limpid red/orange solution was obtained. Suitable crystals for X-ray diffraction were obtained by slow addition of *n*-pentane (10 mL). Yield, 71%. Anal. Calc. (%) for C<sub>22.5</sub>H<sub>24</sub>Cl<sub>2</sub>N<sub>2</sub>PPtS<sub>2</sub> (669.38): C, 40.37; H, 3.62; N, 2.09; S, 9.56. Found: C, 40.48; H, 3.75; N, 2.15; S, 9.90. IR data: 1520 (v, N-CSS); 292 (v, Pt-Cl) cm<sup>-1</sup>.

[PtCl(PyDT)(DMSO)] (**4**) was prepared by addition of **5** (0.7 mmol) to a dimethyl sulfoxide solution in dichloromethane (3.8 mmol in 5 mL). The resulting yellow solution contained a small residue, which was discarded. On standing overnight the separated solution, a yellow powder was obtained, filtered, washed with abundant diethyl ether, and dried under reduced pressure. Yield, 70 %. Anal. Calc. (%) for C<sub>7</sub>H<sub>14</sub>ClNOPtS<sub>3</sub>: C, 18.49; H, 3.11; N, 3.08; S, 21.11. Found: C, 18.62; H, 3.22; N, 3.28; S, 21.52. IR data: 1559 (v, N-CSS); 314 (v, Pt-Cl) cm<sup>-1</sup>.

**Table S1.** Thermogravimetric (TG) and Differential Thermal Analysis (DTA) Data.

| Complex  | Decomposition (°C)<br>Step                       | % weigh loss |       | DTA peak temp, °C<br>(process <sup>a</sup> ) |
|----------|--------------------------------------------------|--------------|-------|----------------------------------------------|
|          |                                                  | found        | calcd |                                              |
| <b>1</b> | 150-214 (– CH <sub>3</sub> Cl)                   | 12.3         | 11.8  | 180 endo, 209 endo                           |
|          | 214-400 to Pt                                    | 41.6         | 42.5  | 338 exo, 368 exo                             |
| <b>2</b> | 210-410 to Pt                                    | 47.7         | 48.2  | 340 exo, 370 exo                             |
| <b>3</b> | 174-193 (– 0.5 CH <sub>2</sub> Cl <sub>2</sub> ) | 6.8          | 6.3   | 187 endo, 214 endo                           |
|          | 288-624 to Pt                                    | 59.2         | 62.9  | 367 exo, 453 exo                             |
| <b>4</b> | 125-275 (– DMSO)                                 | 30.8         | 30.2  | 169 endo                                     |
|          | 280-400 to Pt                                    | 47.7         | 48.5  | 391 exo                                      |

<sup>a</sup> endo, exo; endothermic/exothermic process

#### X-Ray Crystallographic Studies:

Crystals of **2** and **3** were lodged in Lindemann glass capillaries and centered on a four circle Philips PW1100 diffractometer using graphite monochromated MoK $\alpha$  radiation (0.71073Å), following the standard procedures. There were no significant fluctuations of intensities other than those expected from Poisson statistics. The diffraction data were corrected for Lorentz-Polarization effects and for absorption, as described by North et al.<sup>S2</sup> The structures were solved by standard direct methods and subsequently completed by Fourier syntheses.<sup>S3</sup> Non-hydrogen atoms were refined anisotropically in all the structures. Hydrogen atoms, were introduced at the calculated positions with fixed isotropic thermal parameters (1.2 U<sub>equiv</sub> of the parent carbon atom). Structure refinement and final geometrical calculations were carried out with the SHELXL-97 and WinGX programs.<sup>S4</sup>

**Table S2.** Selected bond distances (Å) and angles (°) for complex **3**.

|         |            |             |           |
|---------|------------|-------------|-----------|
| Pt1–P1  | 2.2559(16) | P1–Pt1–S17  | 97.67(7)  |
| Pt1–S17 | 2.293(2)   | P1–Pt1–Cl1  | 94.54(7)  |
| Pt1–S18 | 2.334(2)   | S17–Pt1–S18 | 75.33(7)  |
| Pt1–Cl1 | 2.3614(17) | Cl1–Pt1–S18 | 92.18(7)  |
| P1–C21  | 1.827(6)   | P1–Pt1–S18  | 172.25(6) |
| P1–C31  | 1.837(6)   | S17–Pt1–Cl1 | 166.84(7) |
| P1–C41  | 1.812(6)   | C16–S17–Pt1 | 87.6(2)   |
| N11–C12 | 1.467(9)   | C16–S18–Pt1 | 85.9(2)   |
| N11–C15 | 1.477(8)   |             |           |
| N11–C16 | 1.306(8)   |             |           |
| C16–S17 | 1.738(7)   |             |           |
| C16–S18 | 1.716(7)   |             |           |

## REFERENCES

- [S1] G. Faraglia, D. Montagner, S. Sitran, *Inorg. Chim. Acta*, 2005, **358**, 971–980.
- [S2] A. T. C. North, D. C. Philips, F. S. Mathews, *Acta Crystallogr.*, 1968, A24, 351.
- [S3] A. Altomare, M. C. Burla, M. Camalli, G. L. Cascarano, C. Giacovazzo, A. Guagliardi, A. G. G. Moliterni, G. Polidori, R. Spagna, “SIR–97” *J. Appl. Crystallogr.*, 1999, **32**, 115.
- [S4] (a) G. M. Sheldrick, “SHELXL-97”, Program for the Refinement of Crystal Structures, University of Göttingen, Germany, **1997**; (b) L. J. Farrugia, *J. Appl. Crystallogr.*, 1999, **32**, 837.
